# Supplementary material for: Provision of end-of-life care in primary care: a survey of issues and outcomes in the Australian context
Source: HighWire-hosted journal article supplement (doi:10.1136/bmjopen-2021-053535), 2022-01-01
Supplement: bmjopen-2021-053535supp001_data_supplement.pdf [file bmjopen-2021-053535supp001_data_supplement.pdf]

Supplementary table 1. Characteristics of participating GPs by case-finding mechanisms

|                                               | Prospective case-finding<br>n (%) | Retrospective case-finding<br>n (%) | Comparisons by prospective vs. retrospective case-finding<br>(P-value)* |
|-----------------------------------------------|-----------------------------------|-------------------------------------|-------------------------------------------------------------------------|
| <b>Total number by case-finding mechanism</b> | 41                                | 22                                  |                                                                         |
| <b>Gender</b>                                 |                                   |                                     |                                                                         |
| Male                                          | 20 (48.8)                         | 15 (68.2)                           | 0.19                                                                    |
| Female                                        | 20 (48.8)                         | 7 (31.8)                            |                                                                         |
| Missing                                       | 1 (2.4)                           | 0 (0)                               |                                                                         |
| <b>Age group (years)</b>                      |                                   |                                     |                                                                         |
| < 30                                          | 2 (4.9)                           | 0 (0)                               | 0.20                                                                    |
| 30 - 39                                       | 8 (19.5)                          | 3 (13.6)                            |                                                                         |
| 40 - 49                                       | 11 (26.8)                         | 2 (9.1)                             |                                                                         |
| 50 - 59                                       | 12 (29.3)                         | 12 (54.6)                           |                                                                         |
| 60 - 69                                       | 7 (17.1)                          | 3 (13.6)                            |                                                                         |
| 70 +                                          | 1 (2.4)                           | 2 (9.1)                             |                                                                         |
| <b>Country of Birth</b>                       |                                   |                                     |                                                                         |
| Australia                                     | 20 (48.8)                         | 14 (63.6)                           | 0.42                                                                    |
| Outside Australia                             | 20 (48.8)                         | 8 (36.4)                            |                                                                         |
| Missing                                       | 1 (2.4)                           | 0 (0)                               |                                                                         |
| <b>Country of primary medical training</b>    |                                   |                                     |                                                                         |
| Australia                                     | 27 (65.9)                         | 20 (90.9)                           | 0.06                                                                    |
| Outside Australia                             | 13 (31.7)                         | 2 (9.1)                             |                                                                         |
| Missing                                       | 1 (2.4)                           | 0 (0)                               |                                                                         |
| <b>Locality of practice</b>                   |                                   |                                     |                                                                         |
| City (inner and outer suburbs)                | 13 (31.7)                         | 17 (77.3)                           | < 0.001                                                                 |
| Regional (including country towns)            | 7 (17.1)                          | 5 (22.7)                            |                                                                         |
| Rural and remote                              | 21 (51.2)                         | 0 (0)                               |                                                                         |
| <b>GP Registrar</b>                           |                                   |                                     |                                                                         |
| Yes                                           | 3 (7.3)                           | 3 (13.6)                            | 0.66                                                                    |
| No                                            | 34 (82.9)                         | 19 (86.4)                           |                                                                         |
| Missing                                       | 4 (9.8)                           | 0 (0)                               |                                                                         |
| <b>Years of GP work</b>                       |                                   |                                     |                                                                         |
| Mean (standard deviation)                     | 20 (12)                           | 30 (13)                             | 0.003                                                                   |

|                                                    |           |           |              |
|----------------------------------------------------|-----------|-----------|--------------|
| <b>Usual work hours/week</b>                       |           |           |              |
| Mean (standard deviation)                          | 42 (13)   | 39 (11)   | 0.37         |
| <b>Received formal palliative care training</b>    |           |           |              |
| Yes                                                | 12 (29.3) | 7 (31.8)  | 1.00         |
| No                                                 | 28 (68.3) | 15 (68.2) |              |
| Missing                                            | 1 (2.4)   | 0 (0)     |              |
| <b>Use of symptom assessment tool</b>              |           |           |              |
| Yes                                                | 5 (12.2)  | 2 (9.1)   | 1.00         |
| No                                                 | 36 (87.8) | 19 (96.4) |              |
| Missing                                            | 0 (0)     | 1 (4.5)   |              |
| <b>Right to admit patients to public hospital</b>  |           |           |              |
| Yes                                                | 13 (31.7) | 0 (0)     | <b>0.002</b> |
| No                                                 | 26 (63.4) | 20 (90.9) |              |
| Missing                                            | 2 (4.9)   | 2 (9.1)   |              |
| <b>Right to admit patients to private hospital</b> |           |           |              |
| Yes                                                | 7 (17.1)  | 1 (4.5)   | 0.24         |
| No                                                 | 31 (75.6) | 19 (86.4) |              |
| Missing                                            | 3 (7.3)   | 2 (9.1)   |              |
| <b>Right to admit patients to hospice</b>          |           |           |              |
| Yes                                                | 12 (29.3) | 5 (68.2)  | 0.76         |
| No                                                 | 25 (61.0) | 15 (22.7) |              |
| Missing                                            | 4 (9.7)   | 2 (9.1)   |              |

NOTE: Bold indicates significant value  $P < 0.05$ .

\* Comparisons between prospective and retrospective case-finding mechanisms were conducted using Fisher-exact test and Independent t-test (for years of work and work hours/week)

Supplementary table 2. Characteristics of reported patients with expected death by case-finding mechanisms

|                                     | Prospective case-finding<br>n (%) | Retrospective case-finding<br>n (%) | Comparisons by prospective vs. retrospective case-finding<br>(P-value) <sup>a</sup> |
|-------------------------------------|-----------------------------------|-------------------------------------|-------------------------------------------------------------------------------------|
| <b>Number of expected deaths</b>    | 115                               | 105                                 | 0.19                                                                                |
| <b>Gender</b>                       |                                   |                                     |                                                                                     |
| Male                                | 49 (42.6)                         | 49 (46.7)                           | 0.35                                                                                |
| Female                              | 66 (57.4)                         | 51 (48.6)                           |                                                                                     |
| Missing                             | 0 (0)                             | 5 (4.7)                             |                                                                                     |
| <b>Age at Death</b>                 |                                   |                                     |                                                                                     |
| Median (interquartile range)        | 80 (70 - 89)                      | 84 (72 - 91)                        | 0.14                                                                                |
| <b>Principal Diagnosis</b>          |                                   |                                     |                                                                                     |
| Cancer                              | 49 (42.6)                         | 31 (29.5)                           | 0.08                                                                                |
| Cardiovascular disease              | 16 (13.9)                         | 21 (20.0)                           |                                                                                     |
| Respiratory disease                 | 12 (10.4)                         | 13 (12.4)                           |                                                                                     |
| Neurological disease                | 10 (8.7)                          | 19 (18.1)                           |                                                                                     |
| Other                               | 27 (23.5)                         | 19 (18.1)                           |                                                                                     |
| Missing                             | 1 (0.9)                           | 2 (1.9)                             |                                                                                     |
| <b>Place of death</b>               |                                   |                                     |                                                                                     |
| Hospital apart from palliative care | 24 (20.9)                         | 17 (16.2)                           | 0.65                                                                                |
| Private residence                   | 22 (19.1)                         | 24 (22.8)                           |                                                                                     |
| Residential aged care facility      | 42 (36.5)                         | 35 (33.3)                           |                                                                                     |
| Inpatient palliative care           | 26 (22.6)                         | 27 (25.7)                           |                                                                                     |
| Other                               | 0 (0)                             | 1 (1.0)                             |                                                                                     |
| Missing                             | 1 (0.9)                           | 1 (1.0)                             |                                                                                     |

<sup>a</sup> Comparisons between prospective and retrospective case-finding mechanisms were conducted using Chi-square test and Mann–Whitney U test (for Age at death only)

Supplementary table 3. GPs' involvement in care and continuity of care by case-finding mechanisms

|                                                                                         | Prospective case-finding<br>n (%)               | Retrospective case-finding<br>n (%)             | Comparisons by prospective vs. retrospective case-finding<br>(P-value) <sup>a</sup> |
|-----------------------------------------------------------------------------------------|-------------------------------------------------|-------------------------------------------------|-------------------------------------------------------------------------------------|
| <b>Provision of services involving the GP</b>                                           | N = 115                                         | N = 105                                         |                                                                                     |
| Home visit                                                                              | 97 (84.4)                                       | 87 (82.9)                                       | 0.77                                                                                |
| Consultation by phone                                                                   | 92 (80.0)                                       | 79 (75.2)                                       | 0.40                                                                                |
| Family meeting                                                                          | 83 (72.3)                                       | 72 (68.6)                                       | 0.60                                                                                |
| Care plans/team-care arrangements                                                       | 82 (71.3)                                       | 47 (44.8)                                       | <b>&lt; 0.001</b>                                                                   |
| Counselling                                                                             | 62 (53.9)                                       | 39 (37.1)                                       | <b>0.01</b>                                                                         |
| Hospital consultation                                                                   | 64 (55.7)                                       | 12 (11.4)                                       | <b>&lt; 0.001</b>                                                                   |
| Case conference                                                                         | 53 (46.1)                                       | 20 (19.1)                                       | <b>&lt; 0.001</b>                                                                   |
| Telehealth/videoconference                                                              | 39 (33.9)                                       | 3 (2.9)                                         | <b>&lt; 0.001</b>                                                                   |
| <b>GPs' perceived role</b>                                                              | N = 114                                         | N = 74                                          |                                                                                     |
| Primary care coordinator                                                                | 61 (53.5)                                       | 39 (52.7)                                       | 0.73                                                                                |
| Part of the team                                                                        | 47 (41.2)                                       | 29 (39.2)                                       |                                                                                     |
| Referral                                                                                | 6 (5.3)                                         | 6 (8.1)                                         |                                                                                     |
| <b>Number of patients for whom GPs received feedback on care from external services</b> | N = 115                                         | N = 73                                          |                                                                                     |
| Yes                                                                                     | 61 (53.0)                                       | 53 (72.6)                                       | <b>0.007</b>                                                                        |
| No                                                                                      | 22 (19.1)                                       | 13 (17.8)                                       |                                                                                     |
| Not applicable                                                                          | 32 (27.8)                                       | 7 (9.6)                                         |                                                                                     |
| <b>If yes, from which services? (multiple answers)<sup>b</sup></b>                      |                                                 |                                                 |                                                                                     |
| Hospital apart from palliative care unit                                                | 16 (23.5)                                       | 12 (17.1)                                       | 0.89                                                                                |
| Inpatient palliative care                                                               | 16 (23.5)                                       | 18 (25.7)                                       |                                                                                     |
| Community palliative care service                                                       | 14 (20.6)                                       | 14 (20.0)                                       |                                                                                     |
| Community nursing services                                                              | 4 (5.9)                                         | 6 (8.6)                                         |                                                                                     |
| Residential aged care facility                                                          | 18 (26.5)                                       | 20 (28.6)                                       |                                                                                     |
| <b>Total responses</b>                                                                  | 68                                              | 70                                              |                                                                                     |
| <b>Level of satisfaction with feedback</b>                                              | <b>Median (interquartile range)<sup>b</sup></b> | <b>Median (interquartile range)<sup>b</sup></b> |                                                                                     |
| Hospital apart from palliative care unit                                                | 4 (3.5 - 5)                                     | 4 (4 - 5)                                       | 0.52                                                                                |
| Inpatient palliative care                                                               | 5 (4 - 5)                                       | 5 (4 - 5)                                       | 0.56                                                                                |
| Community palliative care service                                                       | 5 (5 - 5)                                       | 5 (4 - 5)                                       | <b>0.01</b>                                                                         |

|                                |               |           |              |
|--------------------------------|---------------|-----------|--------------|
| Community nursing services     | 4.5 (3.5 - 5) | 4 (4 - 5) | 0.79         |
| Residential aged care facility | 5 (5 - 5)     | 5 (4 - 5) | <b>0.004</b> |
| <b>Total responses</b>         | 60            | 65        |              |

NOTE: Bold indicates significant value  $P < 0.05$ .

<sup>a</sup> Comparisons between prospective and retrospective case-finding mechanisms were conducted using Fisher-exact test and Mann–Whitney U test (for Level of satisfaction with feedback only)

<sup>b</sup> This is a multiple-answer question. For each patient, GPs could indicate that they received feedback for the last week of care from more than one external service. Percentages were calculated based on the total responses

Supplementary table 4. Aspects of end-of-life care identified as difficult or challenging\* compared by case-finding mechanisms

|                                                                                           | Prospective case-finding<br>n (%) | Retrospective case-finding<br>n (%) | Comparisons by prospective vs. retrospective case-finding<br>(P-value) <sup>a</sup> |
|-------------------------------------------------------------------------------------------|-----------------------------------|-------------------------------------|-------------------------------------------------------------------------------------|
| <b>Whether care could have been improved<br/>(n = 208)</b>                                | N = 115                           | N = 105                             |                                                                                     |
| Yes                                                                                       | 42 (36.5)                         | 30 (28.6)                           | 0.23                                                                                |
| No                                                                                        | 73 (63.5)                         | 74 (70.5)                           |                                                                                     |
| Missing                                                                                   | 0 (0)                             | 1 (0.9)                             |                                                                                     |
| <b>Different aspects of end-of-life care <sup>b</sup></b>                                 |                                   |                                     |                                                                                     |
| Physical treatment and care of the patient                                                | 45 (18.9)                         | 43 (29.5)                           | <b>0.008</b>                                                                        |
| Psychological, social and existential treatment and care of the patient                   | 47 (19.7)                         | 29 (19.9)                           |                                                                                     |
| Support of family and informal caregivers                                                 | 38 (16.0)                         | 12 (8.2)                            |                                                                                     |
| Communication, planning and decision-making with the patient                              | 28 (11.8)                         | 17 (11.6)                           |                                                                                     |
| Communication, planning and decision-making with the family and other informal caregivers | 26 (10.9)                         | 14 (9.6)                            |                                                                                     |
| Support of the patient to stay at home/be cared at home                                   | 26 (10.9)                         | 12 (8.2)                            |                                                                                     |
| Communication/information exchange with other services                                    | 20 (8.4)                          | 5 (3.4)                             |                                                                                     |
| Coordination with other services and continuity of care                                   | 8 (3.4)                           | 14 (9.6)                            |                                                                                     |
| <b>Total responses</b>                                                                    | 238                               | 146                                 |                                                                                     |

NOTE: Bold indicates significant value  $P < 0.05$ .

<sup>a</sup> Comparisons between prospective and retrospective case-finding mechanisms were conducted using Fisher-exact test

<sup>b</sup> GPs were requested to select up to three most challenging tasks for care of each patient. Percentages were calculated based on total responses.

Supplementary table 5. Presence of symptoms and symptom relief for patients in the last week of life by case-finding mechanisms

|                                                                                  | Pain n(%) |           | Sleep problems n(%) |           | Nausea n(%) |           | Fatigue n(%) |           | Loss of appetite n(%) |           | Breathing problems n(%) |           | Bowel problems n(%) |           | Psychological problems n(%) |           |
|----------------------------------------------------------------------------------|-----------|-----------|---------------------|-----------|-------------|-----------|--------------|-----------|-----------------------|-----------|-------------------------|-----------|---------------------|-----------|-----------------------------|-----------|
|                                                                                  | P         | R         | P                   | R         | P           | R         | P            | R         | P                     | R         | P                       | R         | P                   | R         | P                           | R         |
| <b>Data collection mechanisms</b>                                                |           |           |                     |           |             |           |              |           |                       |           |                         |           |                     |           |                             |           |
| <b>Presence of symptoms</b>                                                      | N = 115   | N = 100   | N = 115             | N = 87    | N = 115     | N = 94    | N = 115      | N = 98    | N = 115               | N = 96    | N = 115                 | N = 91    | N = 115             | N = 86    | N = 115                     | N = 90    |
| Yes                                                                              | 64 (55.7) | 61 (61.0) | 50 (43.5)           | 34 (39.1) | 41 (35.6)   | 45 (47.9) | 90 (78.2)    | 76 (77.5) | 93 (80.9)             | 77 (80.2) | 64 (55.6)               | 57 (62.6) | 28 (24.4)           | 39 (45.3) | 45 (39.1)                   | 47 (52.2) |
| No                                                                               | 40 (34.8) | 30 (30.0) | 53 (46.1)           | 42 (48.3) | 60 (52.2)   | 36 (38.3) | 17 (14.8)    | 13 (13.3) | 13 (11.3)             | 10 (10.4) | 40 (34.8)               | 27 (29.7) | 68 (59.1)           | 39 (45.3) | 47 (40.9)                   | 34 (37.8) |
| Unknown                                                                          | 11 (9.5)  | 9 (9.0)   | 12 (10.4)           | 11 (12.6) | 14 (12.2)   | 13 (13.8) | 8 (7.0)      | 9 (9.2)   | 9 (7.8)               | 9 (9.4)   | 11 (9.6)                | 7 (7.7)   | 19 (16.5)           | 8 (9.4)   | 23 (20.0)                   | 9 (10.0)  |
| Comparisons by prospective vs. retrospective case-finding (P-value) <sup>a</sup> | 0.72      |           | 0.78                |           | 0.13        |           | 0.81         |           | 0.91                  |           | 0.60                    |           | <b>0.006</b>        |           | 0.07                        |           |
| <b>If symptom reported, to what degree was it addressed*</b>                     | N = 64    | N = 53    | N = 50              | N = 31    | N = 41      | N = 39    | N = 90       | N = 66    | N = 93                | N = 68    | N = 64                  | N = 51    | N = 28              | N = 32    | N = 45                      | N = 45    |
| Well addressed                                                                   | 22 (34.4) | 14 (24.4) | 28 (56.0)           | 12 (38.7) | 15 (36.6)   | 10 (25.7) | 52 (57.8)    | 33 (50.0) | 57 (61.3)             | 34 (50.0) | 30 (46.9)               | 10 (19.6) | 20 (71.4)           | 10 (31.3) | 31 (68.9)                   | 18 (40.0) |
| Not well addressed                                                               | 42 (65.6) | 36 (67.9) | 20 (40.0)           | 17 (54.8) | 25 (61.0)   | 24 (61.5) | 28 (31.1)    | 29 (43.9) | 22 (23.7)             | 29 (42.7) | 34 (53.1)               | 36 (70.6) | 8 (28.6)            | 20 (62.5) | 14 (31.1)                   | 22 (48.9) |
| Unknown                                                                          | 0 (0)     | 3 (5.7)   | 2 (4.0)             | 2 (6.5)   | 1 (2.4)     | 5 (12.8)  | 10 (11.1)    | 4 (6.1)   | 14 (15.0)             | 5 (7.3)   | 0 (0)                   | 5 (9.8)   | 0 (0)               | 2 (6.2)   | 0 (0)                       | 5 (11.1)  |
| Comparisons by prospective vs. retrospective case-finding (P-value) <sup>a</sup> | 0.13      |           | 0.31                |           | 0.19        |           | 0.19         |           | <b>0.03</b>           |           | <b>&lt; 0.001</b>       |           | <b>0.006</b>        |           | <b>0.004</b>                |           |

Abbreviations: P - Prospective case-finding; R - Retrospective case-finding

NOTE: Bold indicates significant value P < 0.05.

\* We assigned scores 1 – 3 as “not well addressed” and 4 – 5 as “well addressed”.

<sup>a</sup> Comparisons between prospective and retrospective case-finding mechanisms were conducted using Chi-square test. Data relating to “unknown” were not included in the analyses.

Supplementary table 6. Sensitivity analyses for symptom relief for patients in the last week of life by case-finding mechanisms

|                                                                                  | Pain n(%)    |              | Sleep problems n(%) |              | Nausea n(%)  |              | Fatigue n(%) |              | Loss of appetite n(%) |              | Breathing problems n(%) |              | Bowel problems n(%) |              | Psychological problems n(%) |              |
|----------------------------------------------------------------------------------|--------------|--------------|---------------------|--------------|--------------|--------------|--------------|--------------|-----------------------|--------------|-------------------------|--------------|---------------------|--------------|-----------------------------|--------------|
|                                                                                  | P            | R            | P                   | R            | P            | R            | P            | R            | P                     | R            | P                       | R            | P                   | R            | P                           | R            |
| <b>Data collection mechanisms</b>                                                |              |              |                     |              |              |              |              |              |                       |              |                         |              |                     |              |                             |              |
| <i>If symptom reported, to what degree was it addressed*</i>                     | N = 64       | N = 53       | N = 50              | N = 31       | N = 41       | N = 39       | N = 90       | N = 66       | N = 93                | N = 68       | N = 64                  | N = 51       | N = 28              | N = 32       | N = 45                      | N = 45       |
| Well-addressed                                                                   | 8<br>(12.5)  | 7<br>(13.2)  | 14<br>(28.0)        | 3<br>(9.7)   | 6<br>(14.6)  | 5<br>(12.8)  | 33<br>(36.7) | 13<br>(19.7) | 43<br>(46.2)          | 16<br>(23.5) | 12<br>(18.8)            | 2<br>(3.9)   | 7<br>(25.0)         | 2<br>(6.3)   | 15<br>(33.3)                | 5<br>(11.1)  |
| Not well-addressed                                                               | 56<br>(87.5) | 43<br>(81.1) | 34<br>(68.0)        | 26<br>(83.9) | 34<br>(82.9) | 29<br>(74.4) | 47<br>(52.2) | 49<br>(74.2) | 36<br>(38.7)          | 47<br>(69.1) | 52<br>(81.3)            | 44<br>(86.3) | 21<br>(75.0)        | 28<br>(87.5) | 30<br>(66.7)                | 35<br>(77.8) |
| Unknown                                                                          | 0<br>(0)     | 3<br>(5.7)   | 2<br>(4.0)          | 2<br>(6.5)   | 1<br>(2.4)   | 5<br>(12.8)  | 10<br>(11.1) | 4<br>(6.1)   | 14<br>(15.0)          | 5<br>(7.4)   | 0<br>(0)                | 5<br>(9.8)   | 0<br>(0)            | 2<br>(6.2)   | 0<br>(0)                    | 5<br>(11.1)  |
| Comparisons by prospective vs. retrospective case-finding (P-value) <sup>a</sup> | 0.81         |              | 0.09                |              | 0.97         |              | <b>0.01</b>  |              | <b>&lt; 0.001</b>     |              | <b>0.04</b>             |              | 0.08                |              | <b>0.04</b>                 |              |

Abbreviations: P - Prospective case-finding; R - Retrospective case-findings

NOTE: Bold indicates significant value P < 0.05.

\* We assigned scores 1 – 2 as “not well addressed” and 3 – 5 as “well addressed”

<sup>a</sup> Comparisons between prospective and retrospective case-finding mechanisms were conducted using Chi-square test or Fisher's exact test. Data relating to “unknown” were not included in the analyses.
